# Supplementary material for: Emerging investigator series: photocatalysis for MBR effluent post-treatment: assessing the effects of effluent organic matter characteristics
Source: Royal Society of Chemistry journal article supplement (doi:10.1039/c8ew00734a), 2019-01-01
Supplement: c8ew00734a1.pdf [file c8ew00734a1.pdf]

1 **Supplemental Information**

2 **Title: Photocatalysis for MBR Effluent Post-Treatment: Assessing the Effects of Effluent**  
3 **Organic Matter Characteristics**

4 Authors:

5 Mostafa Maghsoodi<sup>1T</sup>, Céline Jacquin<sup>2T</sup>, Benoit Teychené<sup>3</sup>, Marc Heran<sup>2</sup>, Volodymyr V. Tarabara<sup>4</sup>,  
6 Geoffroy Lesage<sup>\*2</sup>, Samuel D. Snow<sup>\*1</sup>

7 <sup>1</sup>Department of Civil and Environmental Engineering, Louisiana State University, 3255 Patrick Taylor  
8 Hall, Baton Rouge, Louisiana 70803, United States.

9 <sup>2</sup>IEM (Institut Européen des Membranes), UMR 5635 (CNRS-ENSCM-UM),  
10 Université de Montpellier, Place E. Bataillon, F- 34095, Montpellier, France.

11 <sup>3</sup>Institut de Chimie des Milieux et Matériaux de Poitiers (IC2MP – UMR CNRS 7285), Université de  
12 Poitiers, Ecole Nationale Supérieure d'Ingénieurs de Poitiers, 7 rue Marcel Doré, Bâtiment 16, TSA  
13 41105, 86073 Poitiers Cedex 9, France.

14 <sup>4</sup>Department of Civil and Environmental Engineering, Michigan State University, 428 S. Shaw Lane,  
15 East Lansing, Michigan 48824, United States.

16 <sup>T</sup>These authors contributed equally.

17 \*Corresponding authors: [SSnow@lsu.edu](mailto:SSnow@lsu.edu); [Geoffroy.Lesage@umontpellier.fr](mailto:Geoffroy.Lesage@umontpellier.fr);

18  
19 Table S1. Total organic carbon (TOC) concentrations, measured by a TOC analyzer. Specific UV  
20 absorbance at  $\lambda = 254$  nm ( $SUVA_{254}$ ) values were calculated based on TOC.

| Sample  | TOC<br>(mgC/L) | $SUVA_{254}$ |
|---------|----------------|--------------|
| Pf-MBR1 | 19.27          | 0.050        |
| Pw-MBR1 | 12.13          | 0.038        |
| P-MBR2  | 6.91           | 0.065        |

21

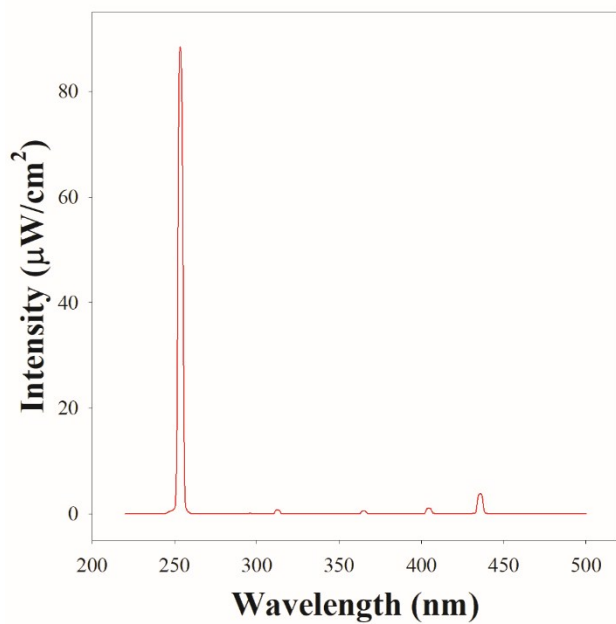

22

23 Figure S1: Light emission spectrum for the low-pressure Hg lamp.

24

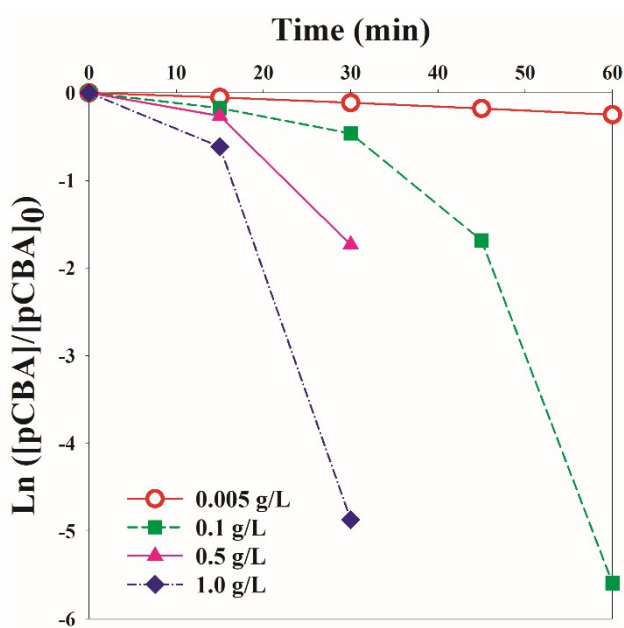

25

26 Figure S2: *p*CBA degradation rate in presence of 10 mg/L humic acid and 0.005, 0.1, 0.5, or 1 g/L  
 27 TiO<sub>2</sub>. The ambient temperature was measured to be 24 °C.

28

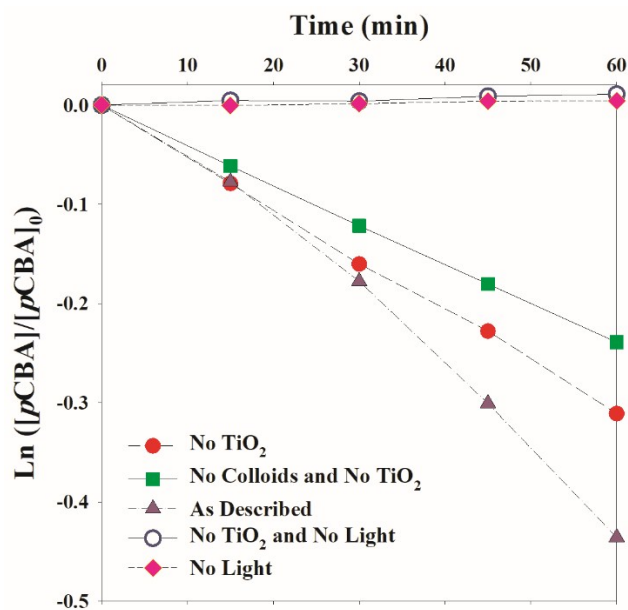

29

30 Figure S3: Degradation of 10 μM pCBA with 5 mg/L TiO<sub>2</sub> and UVC in presence of 10 mg/L Colloids.  
 31 Control experiments made selective exceptions from these conditions, which are noted in the legend.  
 32 The ambient temperature was measured to be 24 °C.

33

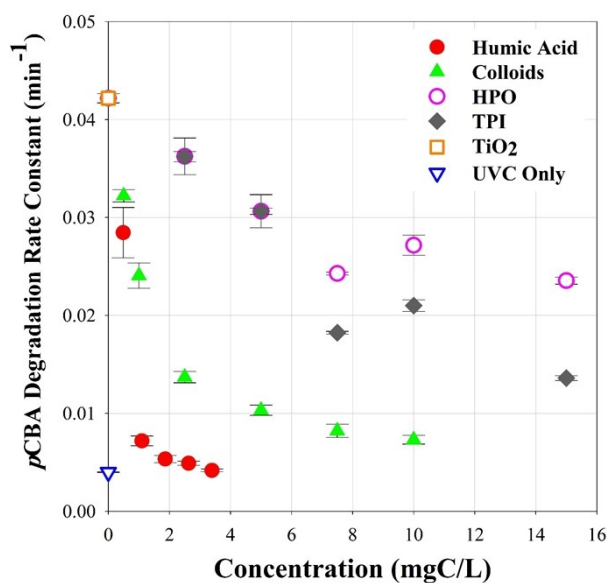

34

35 Figure S4: pCBA degradation rates in the presence of 5 mg/L TiO<sub>2</sub> and various concentrations of  
 36 colloids, TPI, HPO, and HA. Ambient temperature was measured at 24 °C.

37

38

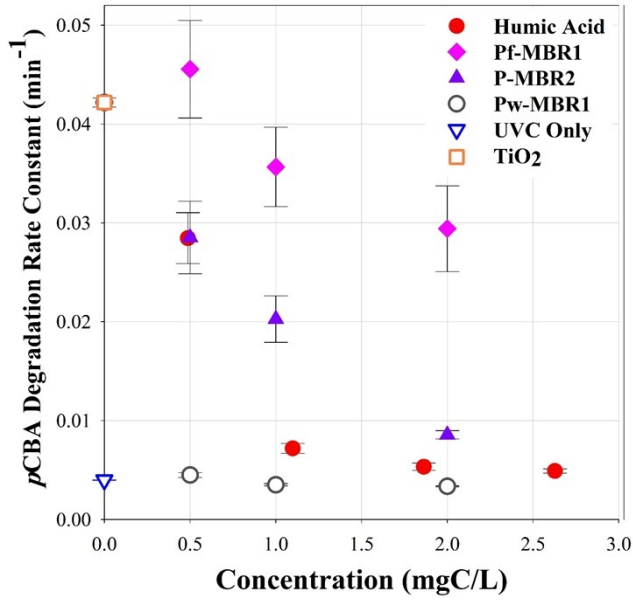

39

40 Figure S5: *p*CBA degradation rates in the presence of various concentrations of effluent from Pf-  
 41 MBR1, Pw-MBR1 and P-MBR2 with 5 mg/L TiO<sub>2</sub>.

42

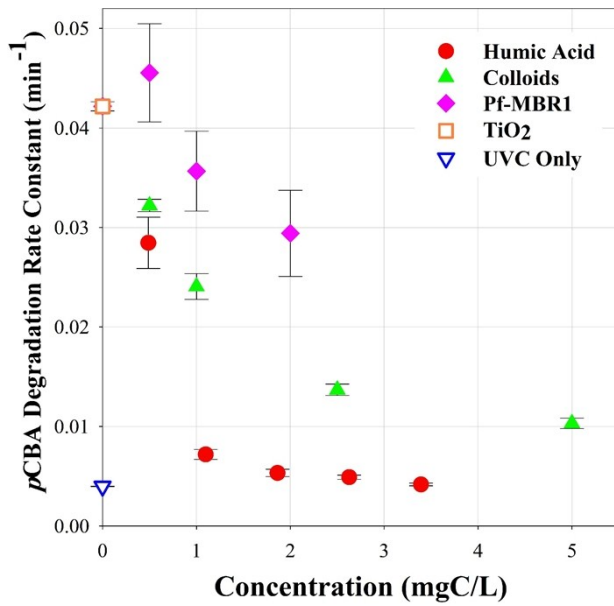

43

44 Figure S6:  $k_{obs,pCBA}$  inhibition profiles of HA, Pf-MBR1, and the colloidal fraction. Data from Figures  
 45 S3 and S4 are used here.

46
